# Supplementary material
Source: PubMed Central journal article supplement (PMC3650639)
Supplement: NIHMS449324-supplement-Figure_1.pdf [file NIHMS449324-supplement-Figure_1.pdf]

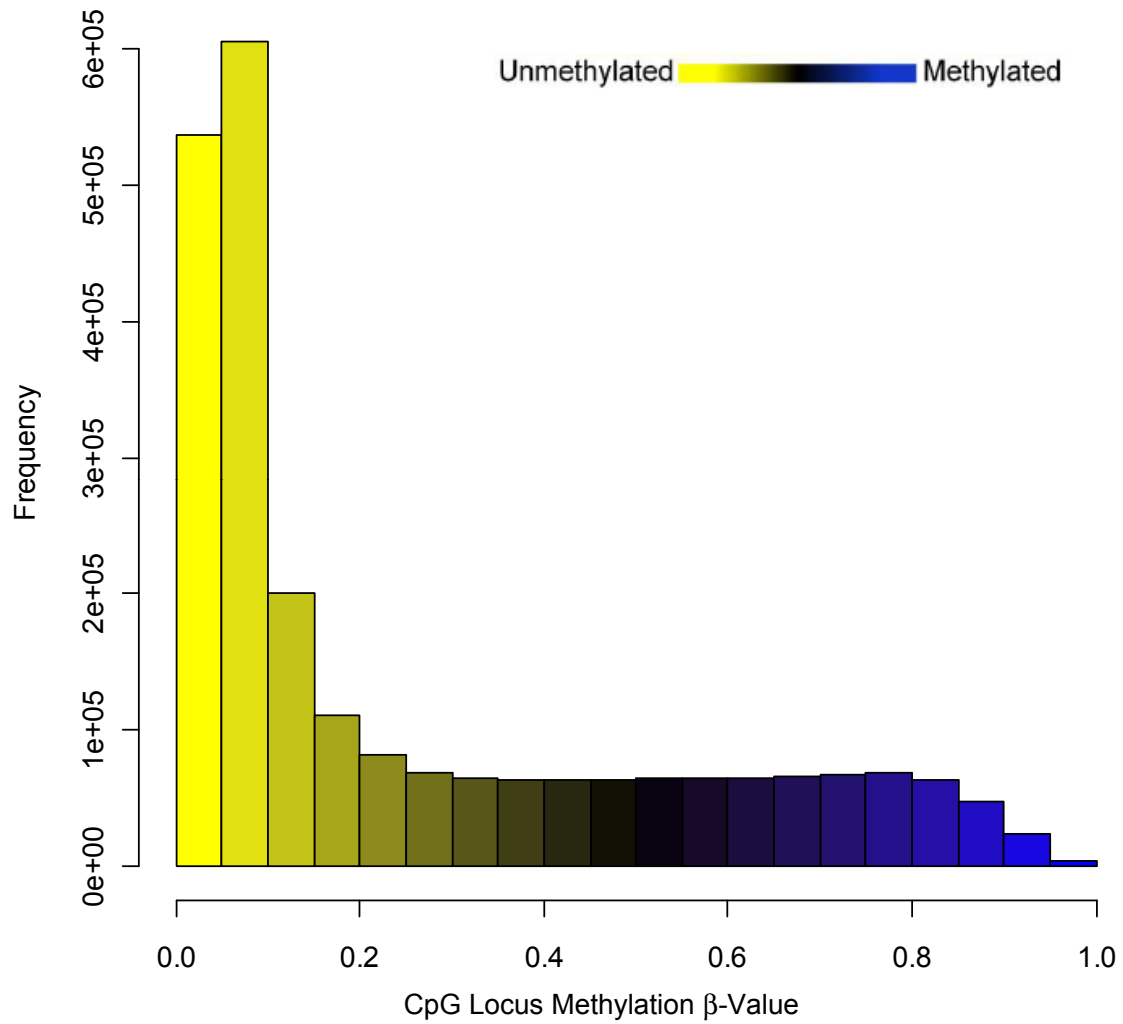

Supplementary Figure 1. Frequency histogram outlining the methylation characteristics of the study population. For each of the 26,377 CpG loci, all 91 tumor beta values were averaged together, binned, and colored according to methylation beta value.
