# Supplementary material
Source: PubMed Central journal article supplement (PMC3650639)
Supplement: NIHMS449324-supplement-Figure_4.pdf [file NIHMS449324-supplement-Figure_4.pdf]

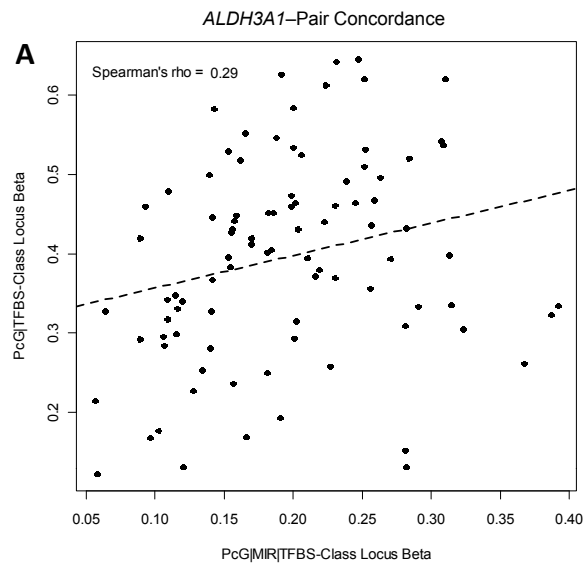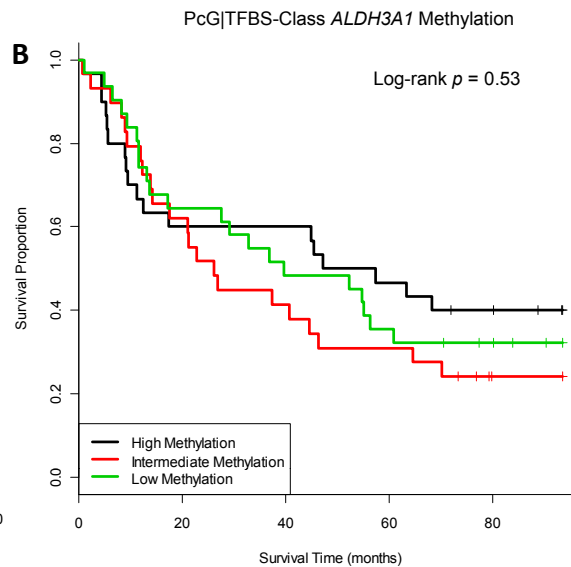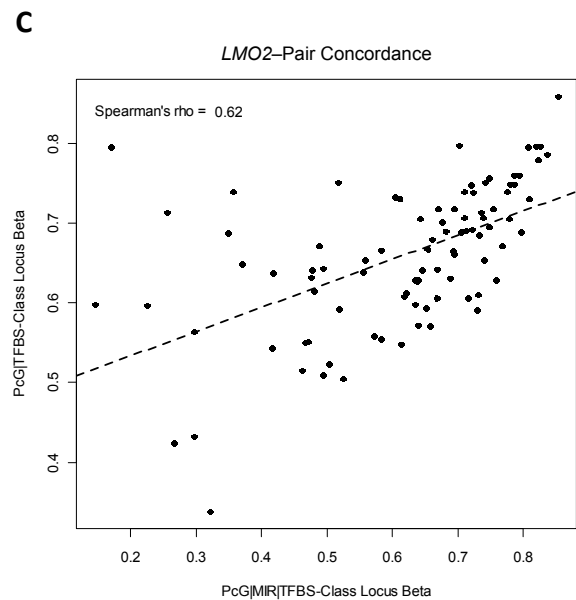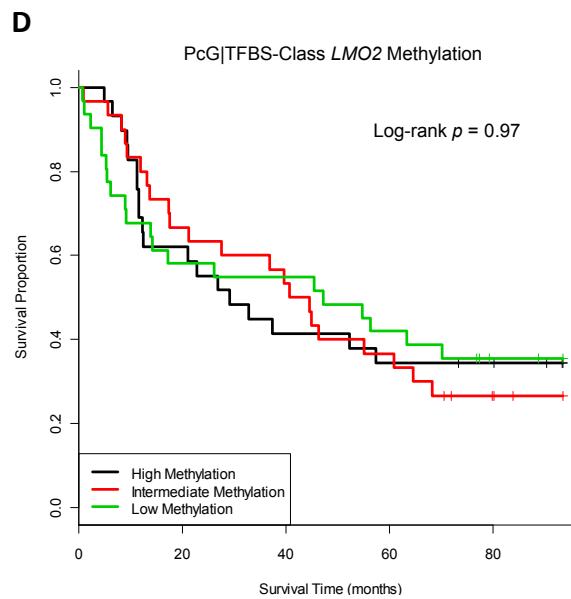

Supplementary Figure 4. Specificity analysis for survival association with PcG|MIR|TFBS locus methylation. For all 91 HNSCCs, array methylation values associated with (A) *ALDH3A1* and (C) *LMO2* loci in the PcG|MIR|TFBS cluster are compared to those of loci in a separate PcG|TFBS cluster but still within the same gene. Dashed lines representing fitted regressions are shown for each concordance plot. In these same tumors, Kaplan-Meier estimates are plotted for high and low methylation groups based solely on the (B) *ALDH3A1* and (D) *LMO2* loci in the PcG|TFBS locus cluster. Survival of patients with methylation in the top tertile is plotted in green, while those in the lowest group are in black. Vertical tick marks represent censored observations and log-rank test  $p$ -values are shown.
