# Supplementary material
Source: PubMed Central journal article supplement (PMC3650639)
Supplement: NIHMS449324-supplement-Table_1.pdf [file NIHMS449324-supplement-Table_1.pdf]

**Supplementary Table 1. Primers Used In Pyrosequencing Validation**

| Gene           | Infinium Locus Name | Forward PCR Primer (5' > 3')  | Reverse PCR Primer (5' > 3')      | Sequencing Primer (5' > 3') |
|----------------|---------------------|-------------------------------|-----------------------------------|-----------------------------|
| <i>ALDH3A1</i> | cg15796819          | TGTATTTTATAGATGAGGAAAGGGAGATT | Bio-TCTAACAACCTCTACCATCCCCCAAAC   | GGAAAGGGAGATTGAGA           |
| <i>TAP1</i>    | cg16853860          | AGAAGAAGTGAGGGAAGATAAAG       | Bio-AACCTAAATTTTAATCCCAAATCTACTAT | GGAAGGAGTTTTAAAGATT         |
